# Supplementary material for: GRIN3A defines an immunosuppressive niche in advanced prostate cancer
Source: Research Square preprint supplement (doi:10.21203/rs.3.rs-7574576/v1), 2025-11-08

**Supplementary table. 1 Primer sequences for Real-time PCR**

| Gene name | Sequence |
| --- | --- |
| GRIN3A | F-5'-CGGGACGCCCTCCTATTTG-3' |
| R-5'-CCACGGTATGGCACACACT-3' |
| ENO2 | F: 5’-GAACTATCCTGTGGTCTCC-3’ |
| R: 5’-CGACATTGGCTGTGAACTTG-3’ |
| CHGA | F:5’-TGCCCAGAATGCACGCTAC-3’ |
| R: 5’-TTGGACCTTAGTGGAGTGGGA-3’ |
| SYP | F: 5’-CCACCTCCTTCTCCAATCAGATG-3’ |
| R: 5’-GGCAGGGCTCAGACAGATAAATA-3’ |
| β-actin | F: 5’-CATGTACGTTGCTATCCAGGC-3’ |
| R: 5’-CTCCTTAATGTCACGCACGAT-3’ |

**Supplementary Figure. 1**


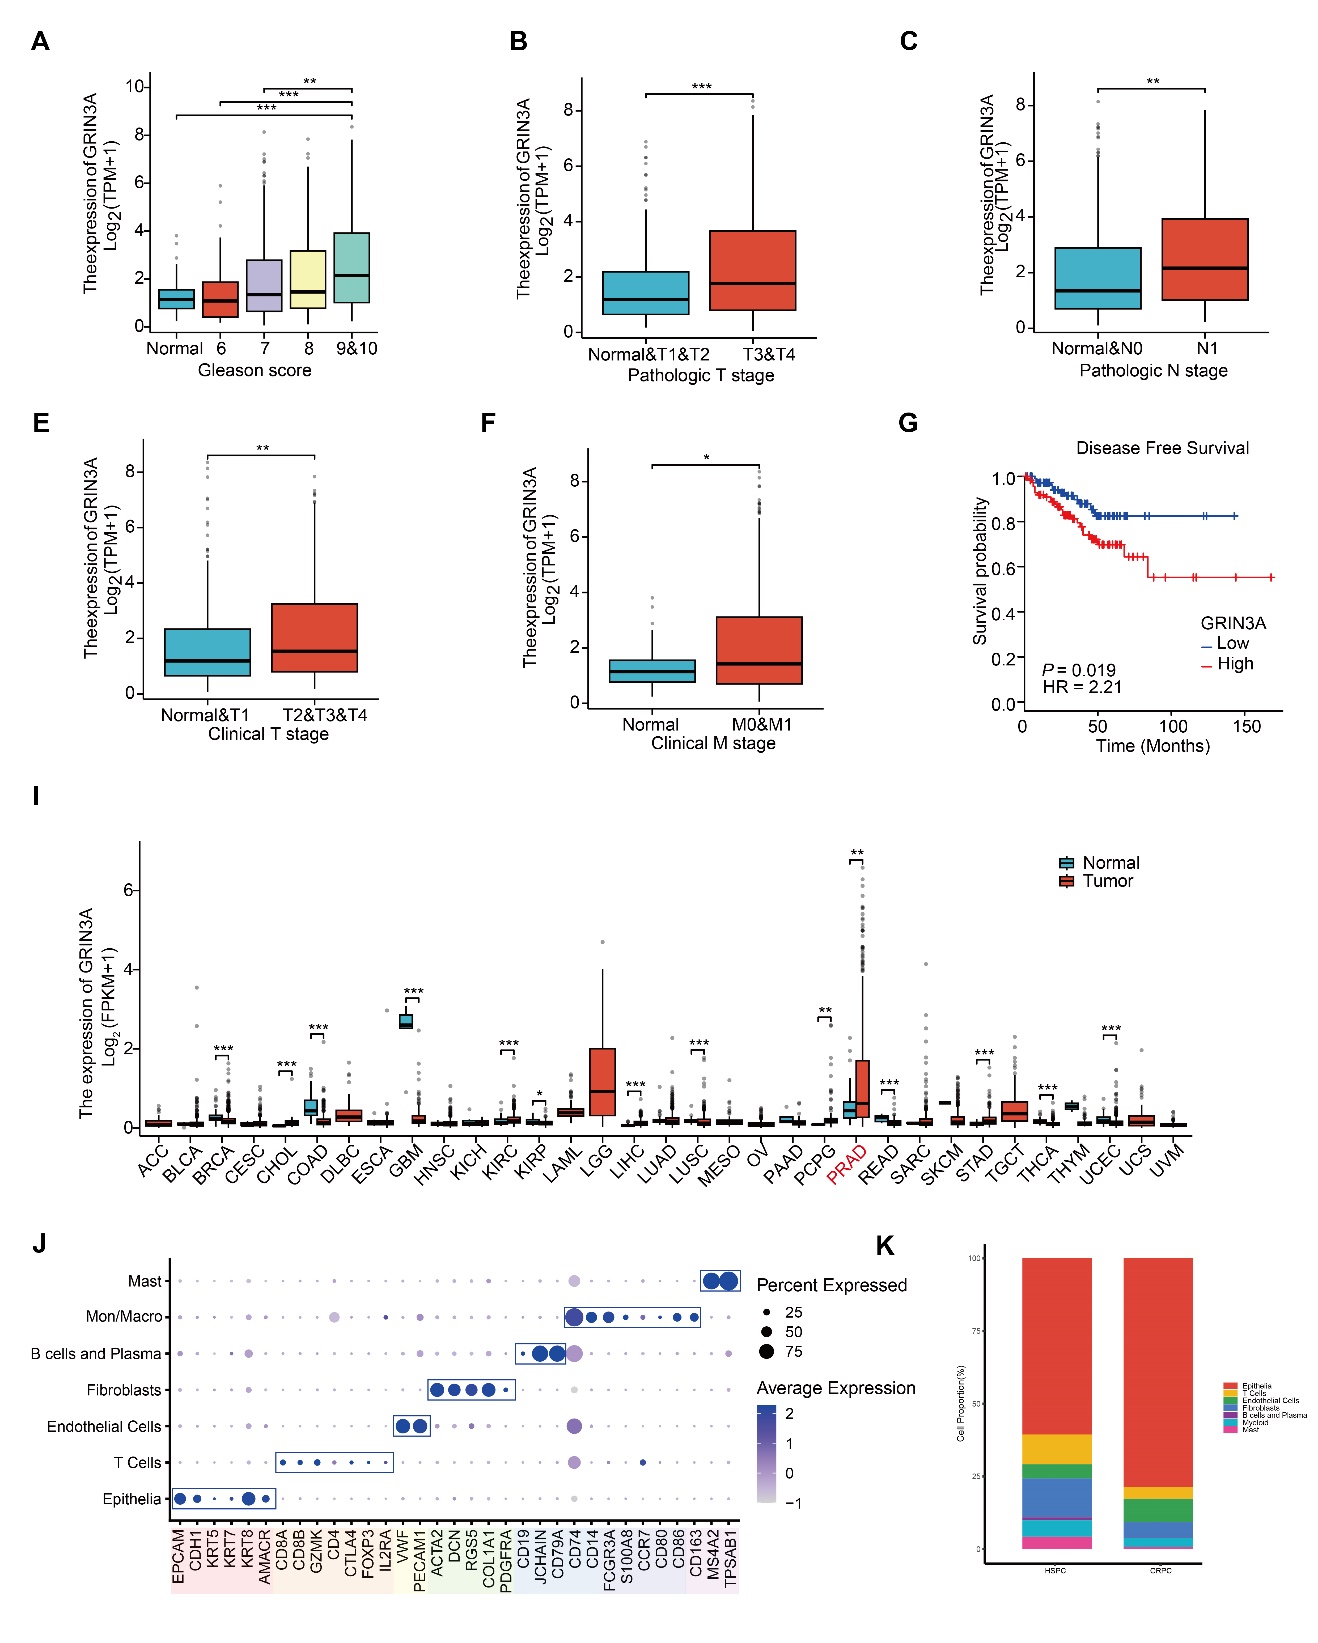


**Supplementary Figure. 2**


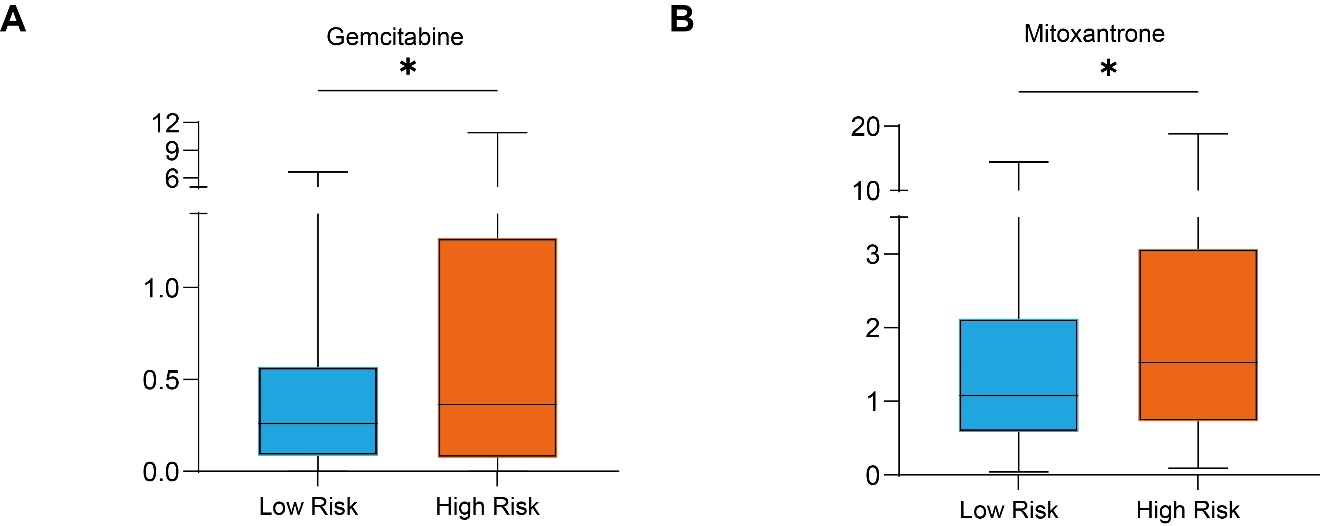

Supplement: Supplementary file 1 [file fc933ccd2364cdec338cd3f0.docx]
